# Supplementary material
Source: MDPI journal article supplement (https://www.mdpi.com/2673-4591/10/1/75)
Supplement: s1 [file s1]

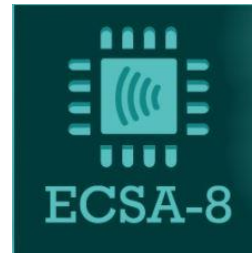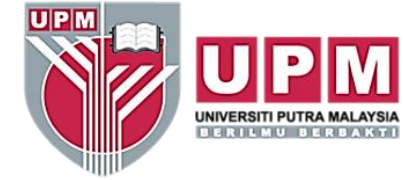

**UNIVERSITI PUTRA MALAYSIA**

**RICULTURE • INNOVATION • LIFE**

**8th International Electronic Conference on Sensors and Applications**

**Tapered Optical Fiber for Hydrogen  
Sensing Application Based on Molybdenum  
trioxide ( $\text{MoO}_3$ )**

**Mohammed M. Alkhabet**

**Saad Girei**

**Suriati Paiman**

**Norhana Arsad**

**Mohd Adzir Mahdi**

**Mohd Hanif Yaacob**

# CONTENT

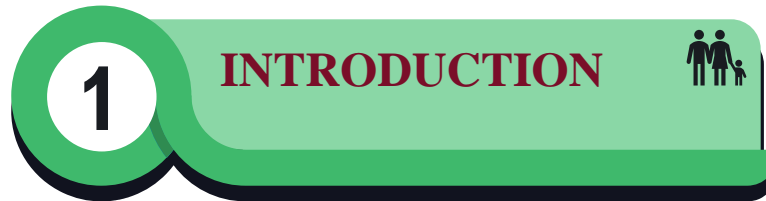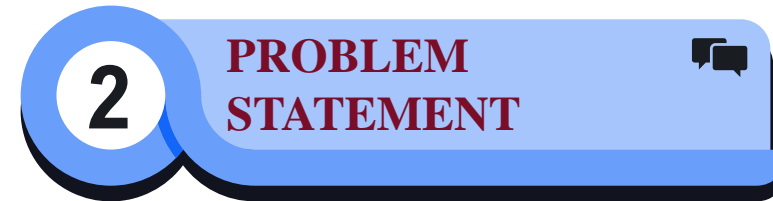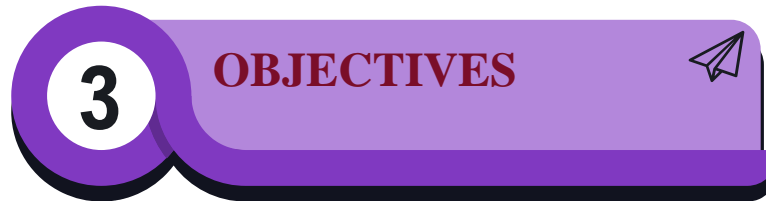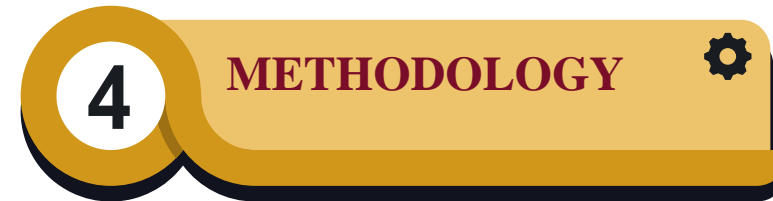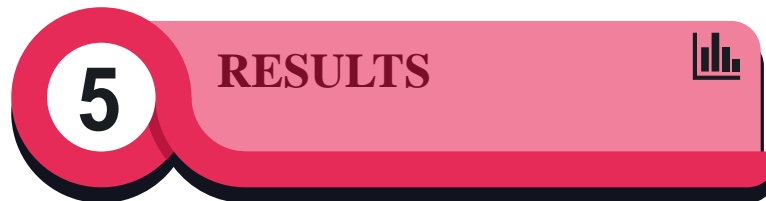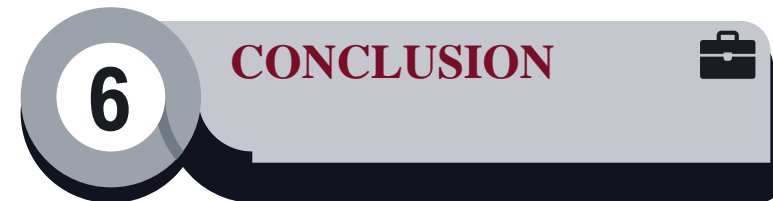

# INTRODUCTION

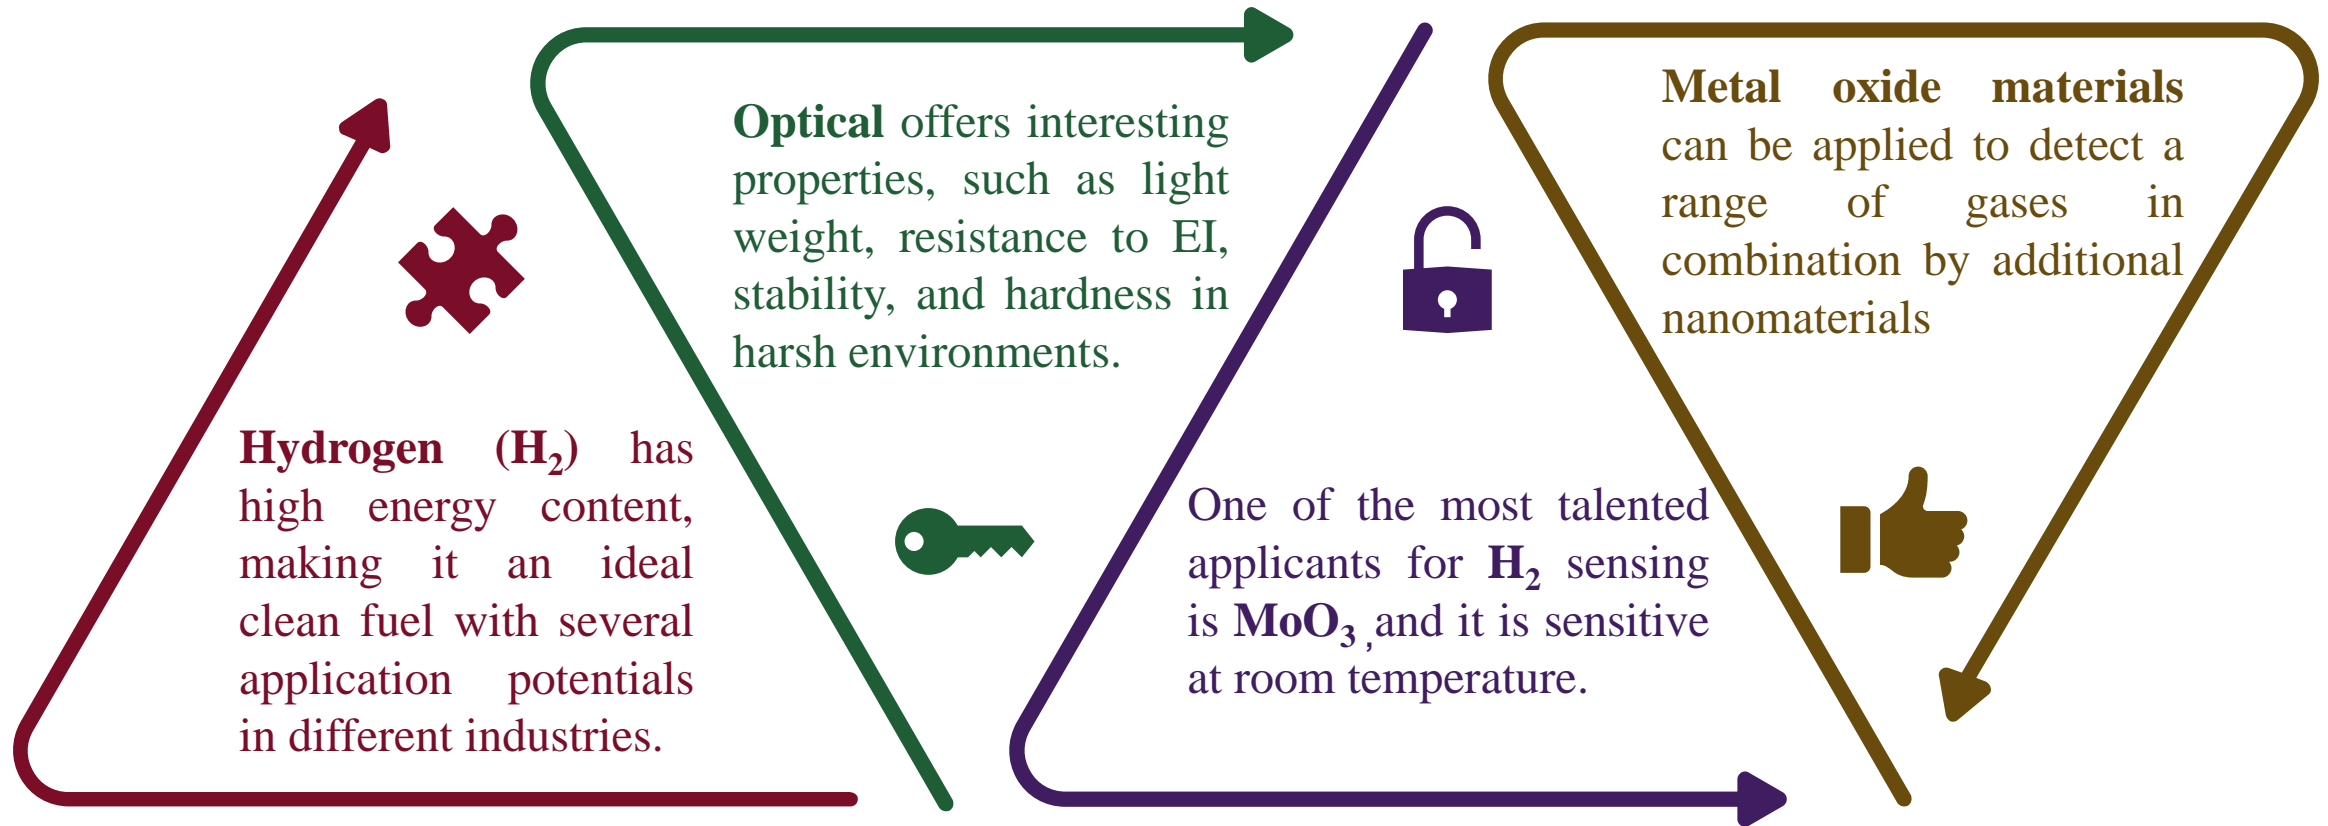

# PROBLEM STATEMENT

- Hydrogen is flammable at concentrations  $> 4$  vol% in the air and can explode at a wider range of 15–59 vol% at standard pressure.
- Currently, there are several types of H<sub>2</sub> sensors available.
  - Electrical sensors (i.e. chemiresistor or microelectronic) are susceptible to electromagnetic interference (EMI) which can affect their response to signals.

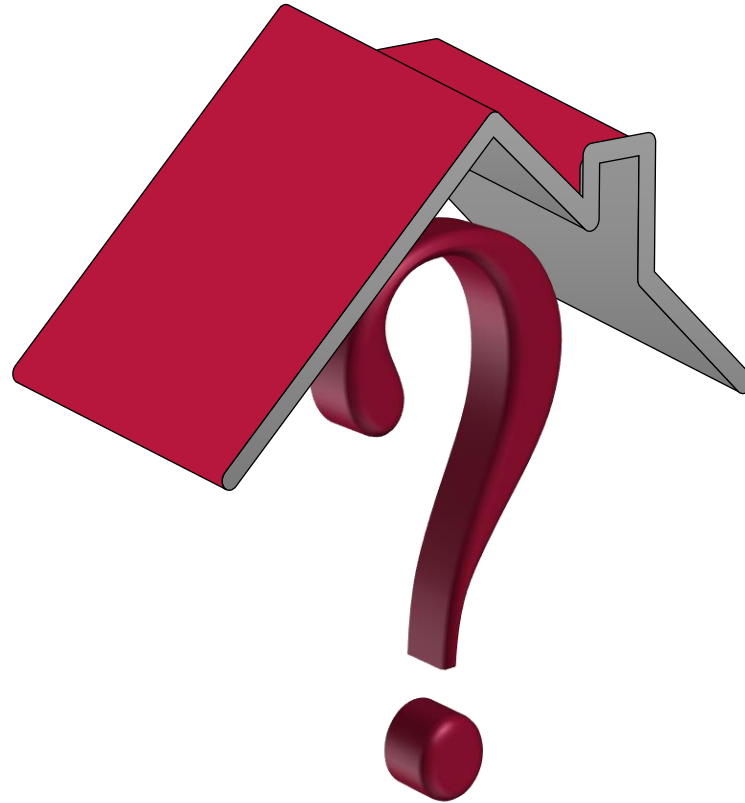

- On the other hand, optical fiber that offers other advantages, such as lightweight, small size, resistance to EMI, non-inductiveness, and ruggedness in harsh environments.
  - These properties make optical fiber an ideal candidate for H<sub>2</sub> detection in rugged environment.

# OBJECTIVES

To design and develop hydrogen gas sensors based on PANI coated on tapered optical fiber via drop-casting technique.

To evaluate the optical fiber sensor performance (sensitivity, response and recovery time, repeatability, and selectivity) based on absorbance measurement.

To discuss the sensing mechanism of gas molecules-sensing layer interaction of tapered optical fiber sensor.

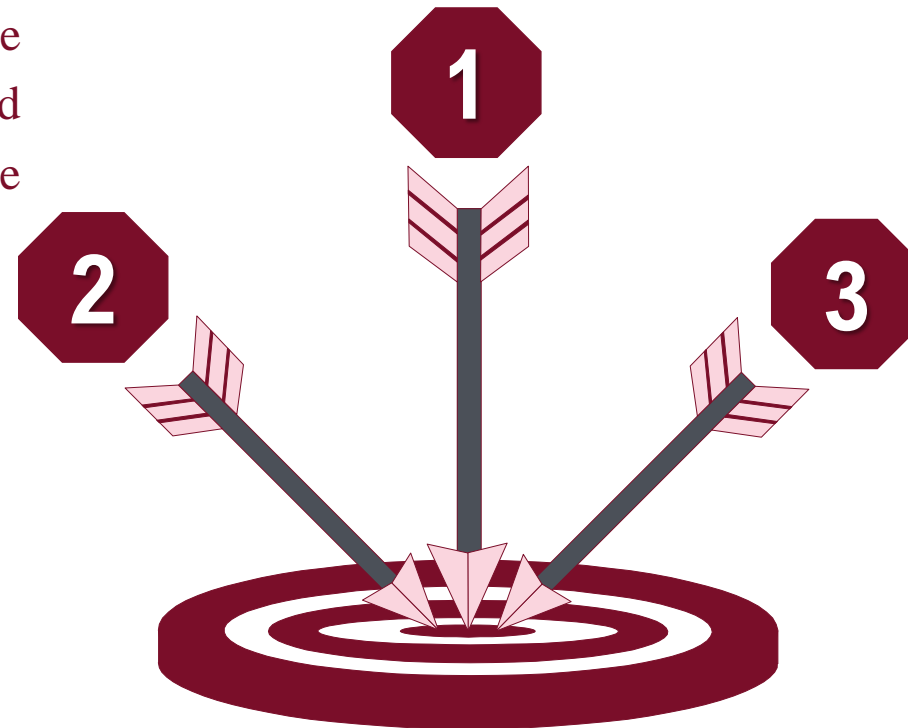

# METHODOLOGY

## Fabrication of Tapered Optical Fiber

- Multimode Optical fiber (MMF) was fabricated with cladding and core diameters of 125  $\mu\text{m}$  and 62.5  $\mu\text{m}$  respectively, as a transducing platform.
- The MMF was tapered from cladding diameter of 125  $\mu\text{m}$  to waist diameter of 20  $\mu\text{m}$ , waist-length of 10 mm, and down taper and up of 5 mm.
- The tapering was done using the Vytran glass processing machine (Vytran GPX-3400).
- The machine works based on a heating and pulling process, using a graphite filament as a heater to achieve the desired geometry of the tapered profile.

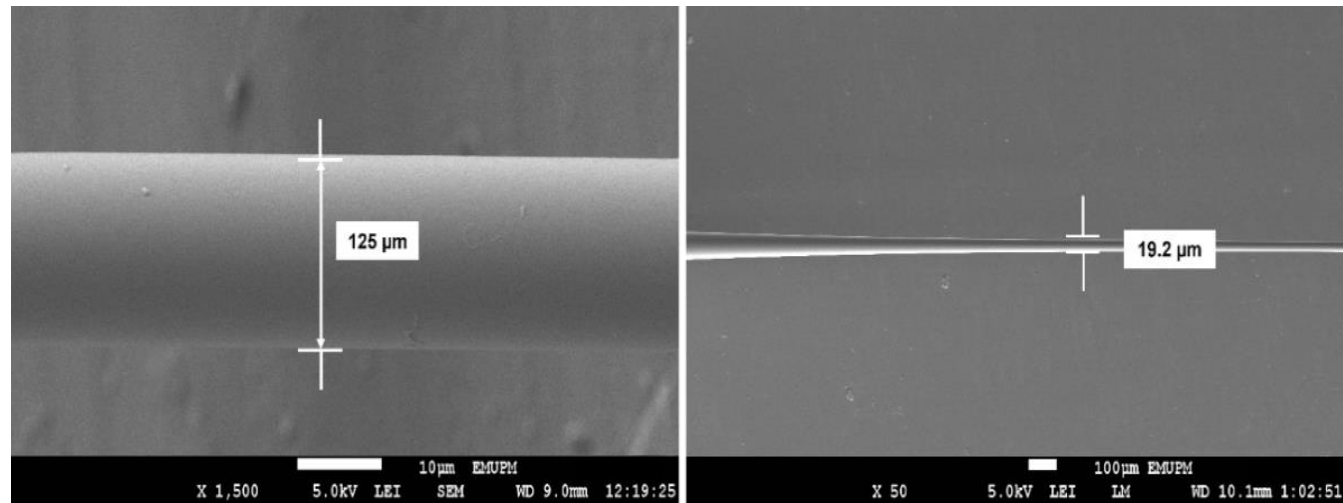

(SEM) micrograph of the transition region of the prepared tapered multimode optical fiber (MMF)

# METHODOLOGY

## MoO<sub>3</sub> Functionalization of the Tapered Optical Fiber

- Molybdenum trioxide (MoO<sub>3</sub>) powder was synthesized by simple solid decomposition method.
- 2.50 g of ammonium heptamolybdate tetrahydrate.
- Annealed in an alumina crucible at 500 °C for three hours in the air.
- A 10 mL of deionized water.
- A milk-white suspension after ultrasonic treatment for 30 minutes.
- The coating of the tapered optical fiber was done using the drop-casting technique.
- A drop of the mixture (approx. 10 μL) was dropped into the base of the tapered optical fiber.
- Heating the sample at 80 °C for 15 minutes in the oven to ensure complete evaporation of the aqueous medium.

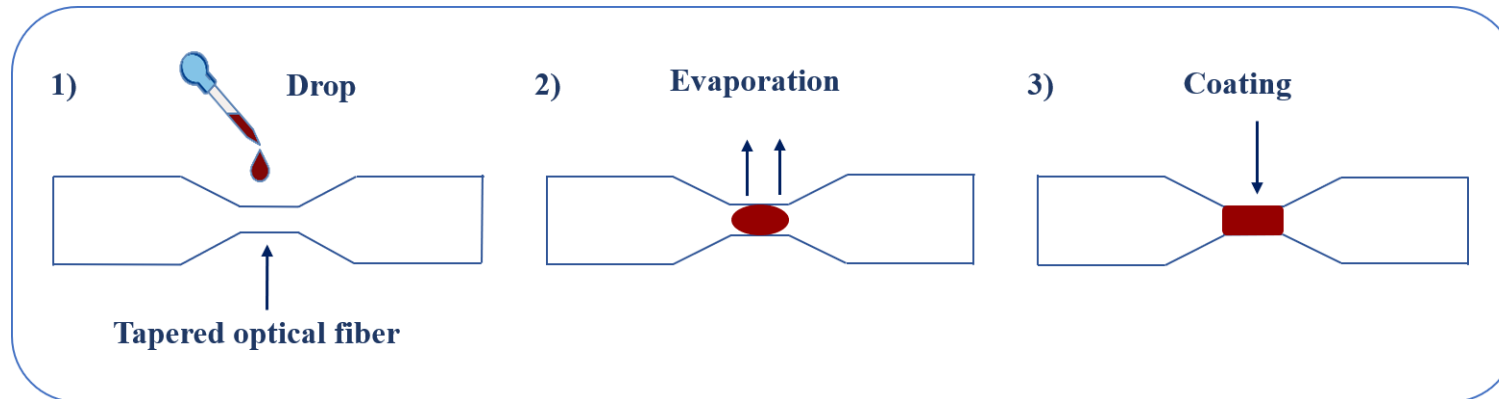

Steps of the drop-casting technique.

# METHODOLOGY

## The experimental setup

- The gas optical sensing system consists of a light source (Tungsten Halogen, HL-2000, Ocean Optics USA) with coverage wavelength of 360 to 2500 nm.
- A spectrophotometer (USB 4000, Ocean Optics USA) with a detection range of 200-1100 for monitoring the optical absorption spectrum.
- A dedicated gas chamber.
- The MoO<sub>3</sub> coated sensor was placed in a closed gas unit and purged with the centrifuge from a computer-regulated mass flow controller at a gas flow rate of 200 sccm.

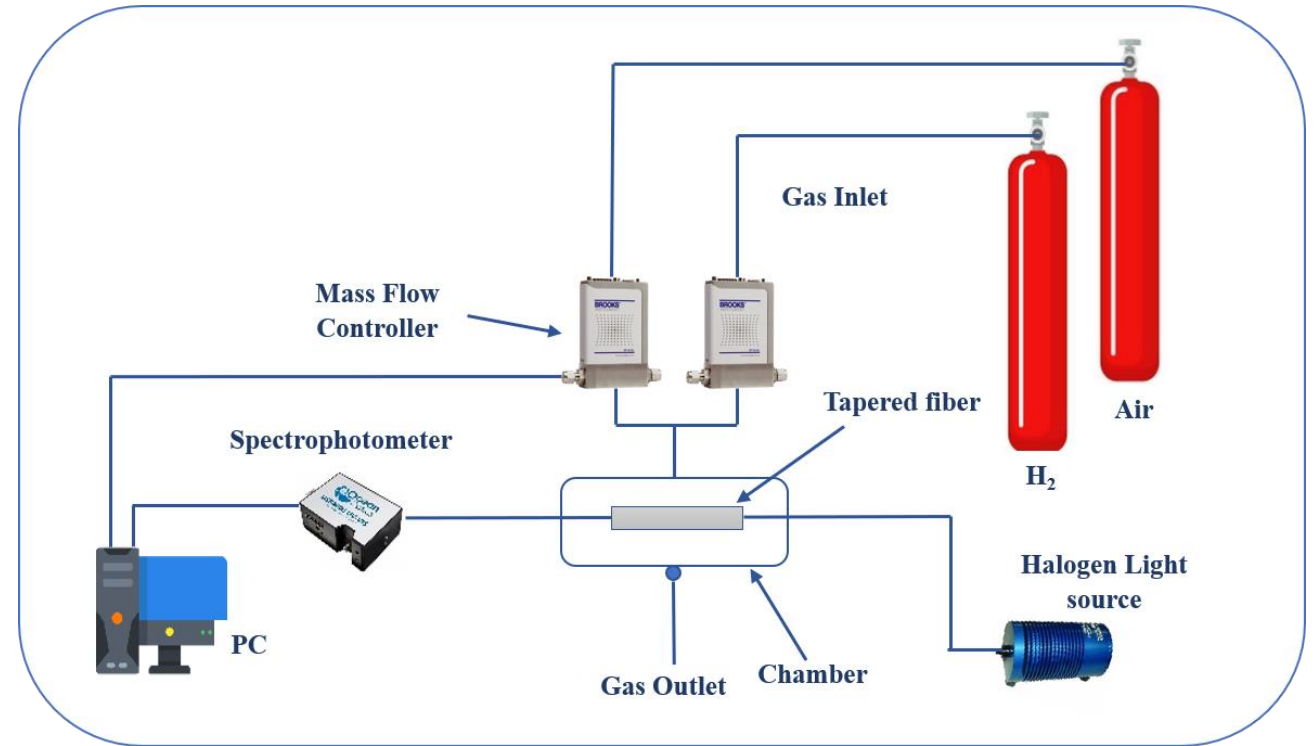

The experimental setup of the H<sub>2</sub> sensor.



# METHODOLOGY

## Material Characterization

- The films' morphology was observed using Field Emission Scanning Electron Microscope (FESEM) (JSM-7600F).
- The FESEM images of  $\text{MoO}_3$  shows that it is The particles agglomerated in nature after attempting to form thin plate or flake-like formations. The gas analyte will interact more effectively with this plate-like structure.

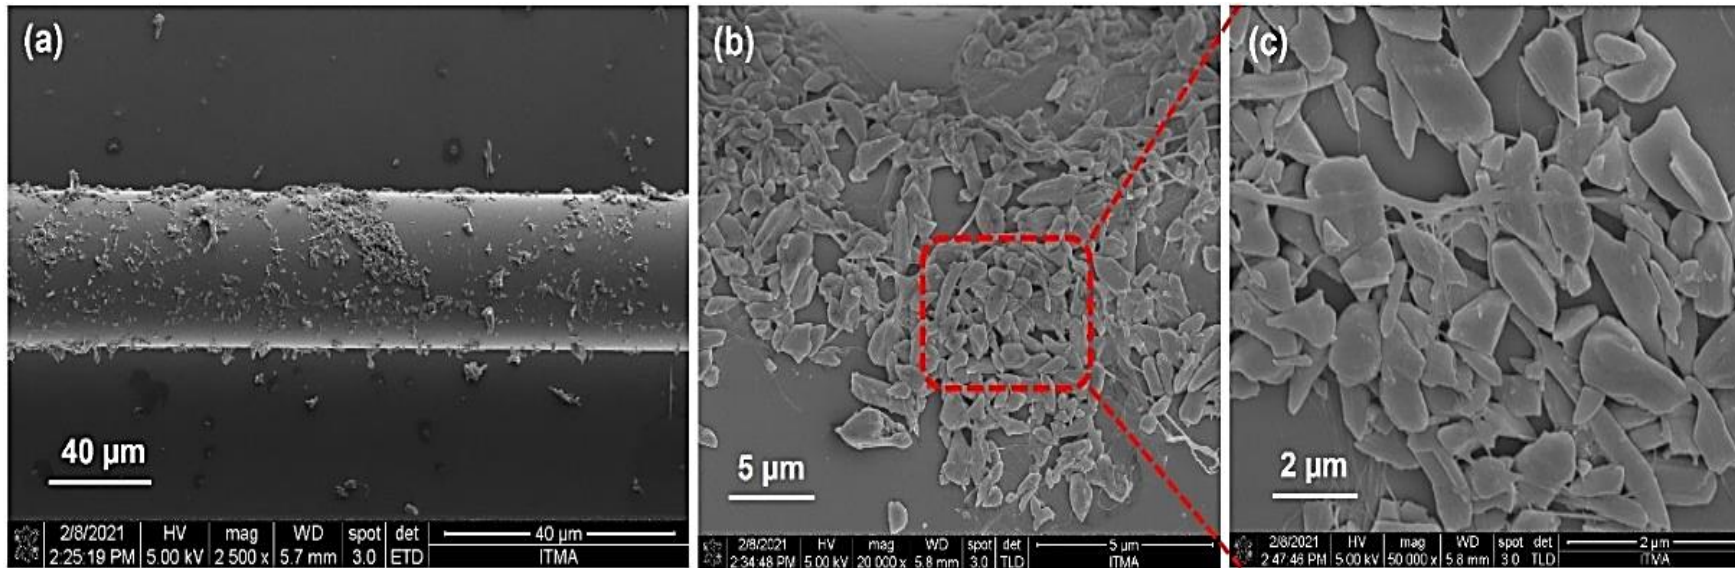

FESEM micrograph of  $\text{MoO}_3$  .

# METHODOLOGY

## Material Characterization

- The elemental composition of  $\text{MoO}_3$  was determined through an Energy Dispersive X-Ray (EDX) analysis as shown in Figure (b).
- The EDX pattern of  $\text{MoO}_3$  showed that the important elements in  $\text{MoO}_3$  films are Mo, O and Si, as evidenced by their respective peaks.
- Material identification and phase transition of  $\text{MoO}_3$  was observed by an X-Ray Diffraction (XRD) analysis (APD 2000) as shown in Figure (a).
- XRD patterns of the coated sensor recorded in range  $2\theta$ , from  $5^\circ$  to  $70^\circ$ .
- All the XRD peaks can be distinguished for the sample, and single-phase can be as-signed to crystal structures. The prominent diffraction peak corresponding to planes (100) and (210) placed at the highest density of  $\text{MoO}_3$ .

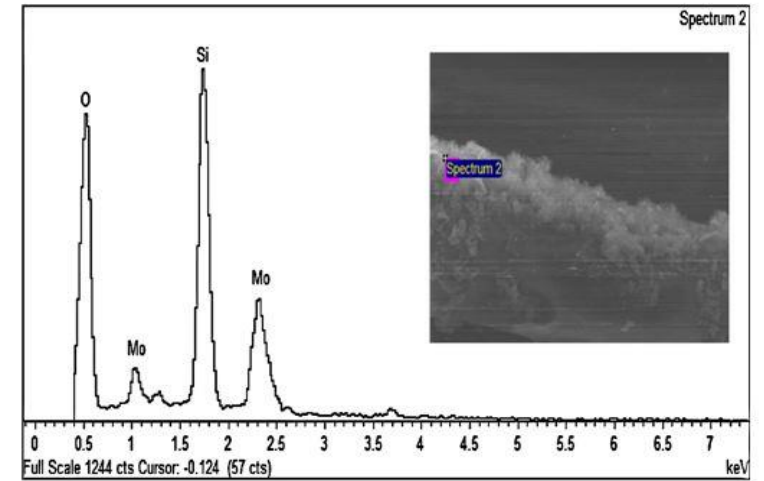

(a)

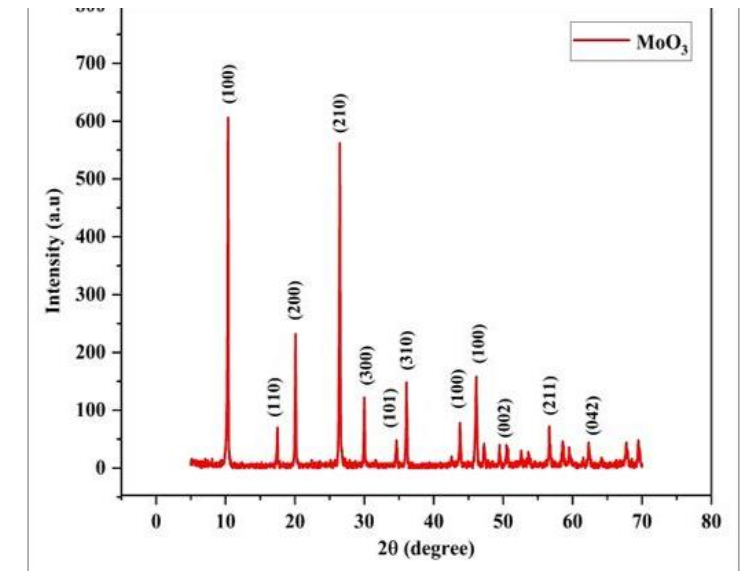

(b)

# METHODOLOGY

## Material Characterization

- The atomic force microscope (AFM) can verify the average surface roughness and thicknesses of  $\text{MoO}_3$ 
  - A  $10 \times 10 \mu\text{m}$  section of the boundary area was scanned for the AFM analysis.
  - The average surface roughness values of the  $\text{MoO}_3$  were  $\approx 44.98 \text{ nm}$ , as shown in (a and b).
- As part of this study, the thicknesses of the  $\text{MoO}_3$  coatings were measured.
  - As part of this study, the thicknesses of the  $\text{MoO}_3$  coatings were measured. As shown in Figure 5c, The average thickness of the  $\text{MoO}_3$  coatings was  $181 \text{ nm}$ .

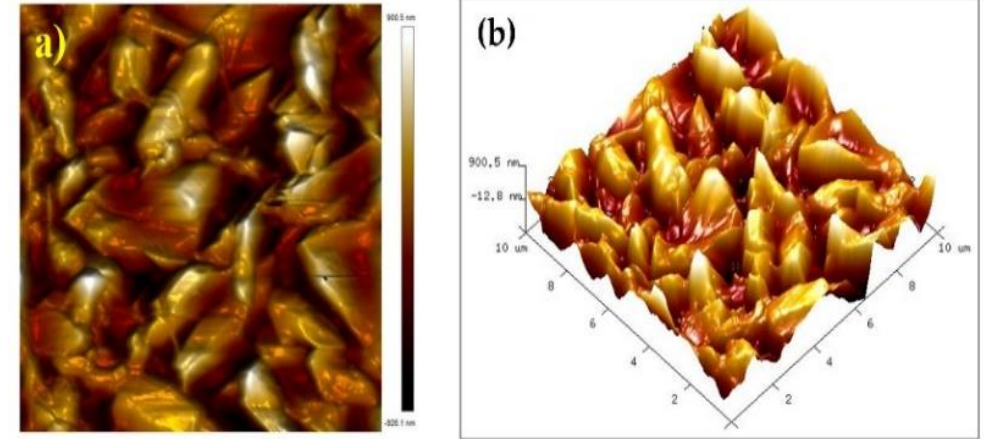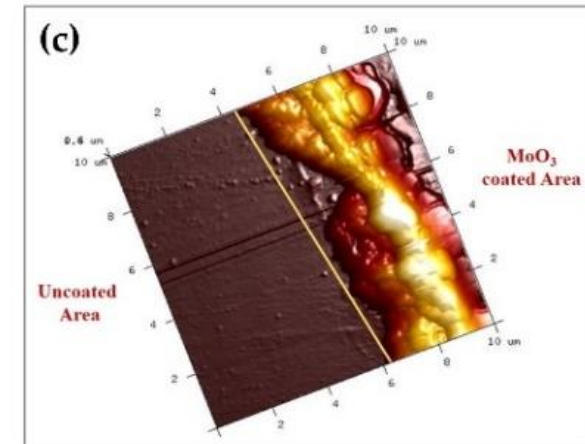

# RESULTS AND DISCUSSION

- The absorption spectra of the sensor coated with  $\text{MoO}_3$  to synthetic air at room temperature with different concentration 0.125% to 2.00%  $\text{H}_2$ .
- The  $\text{MoO}_3$  sensor demonstrated notable changes in absorbance, especially in the wavelength range of 550-850 nm as shown in Figure (a).
- The response time and recovery time of the  $\text{MoO}_3$  coated sensor was 200 s and 220 s respectively. Changes in absorption at 0.125%  $\text{H}_2$  are about 8% and 25% higher at 2.00%  $\text{H}_2$  as shown in Figure (b).
- The  $\text{MoO}_3$  coated sensor showed stronger absorbance and recovery of  $\text{H}_2$  at higher absorption changes.

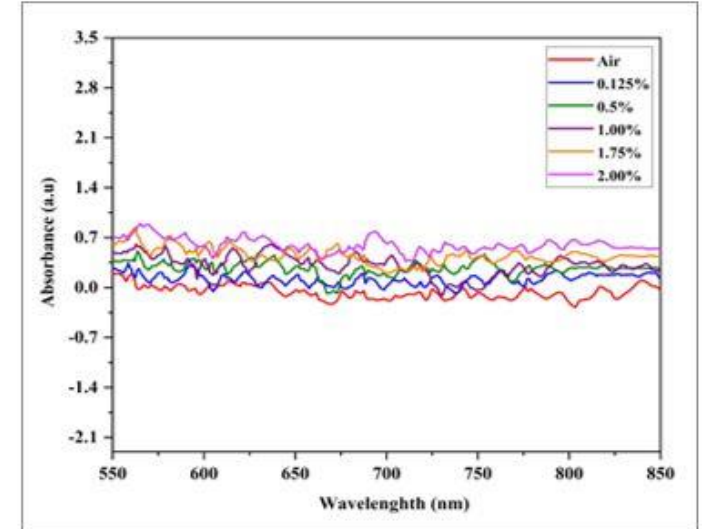

(a)

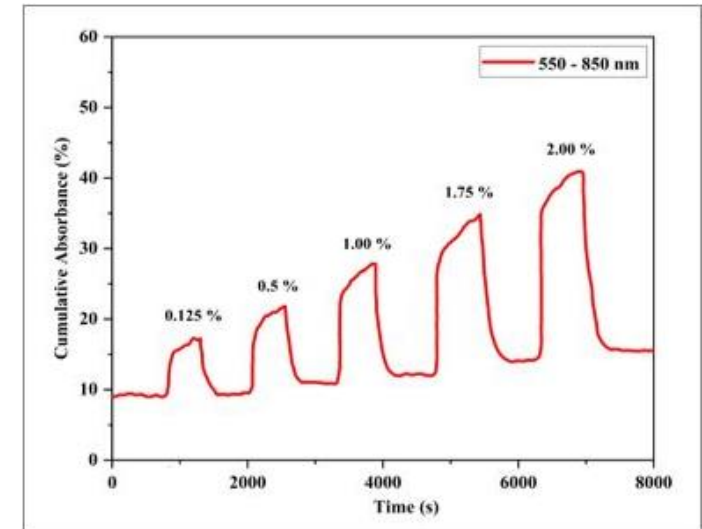

(b)

# RESULTS AND DISCUSSION

- Sensor repeatability was confirmed by exposure of the sensor to 3 cycles of 2.00% H<sub>2</sub>. Overall, the MoO<sub>3</sub> coated sensor showed a high level of good repeatability of H<sub>2</sub>.
- A test for selectivity was done for MoO<sub>3</sub> coated sensor toward NH<sub>3</sub> and CH<sub>4</sub> gas at 1.00%.
- The MoO<sub>3</sub> coated based sensor had a very high NH<sub>3</sub> absorption response but a substantially lower response for the other gases.

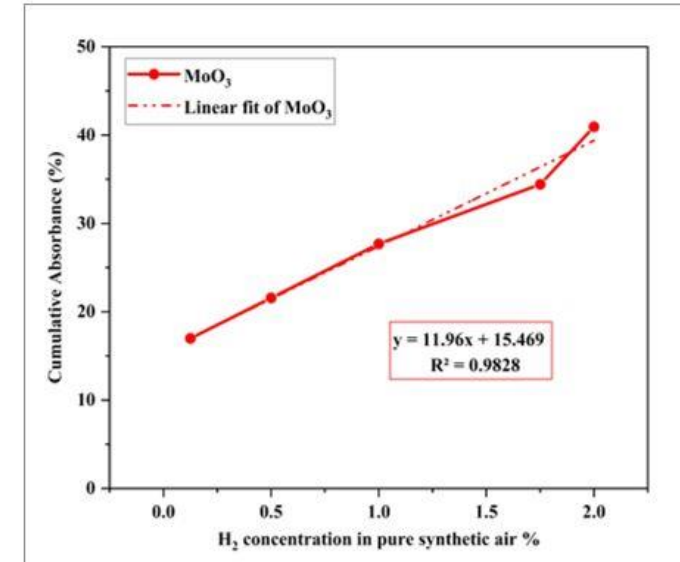

(a)

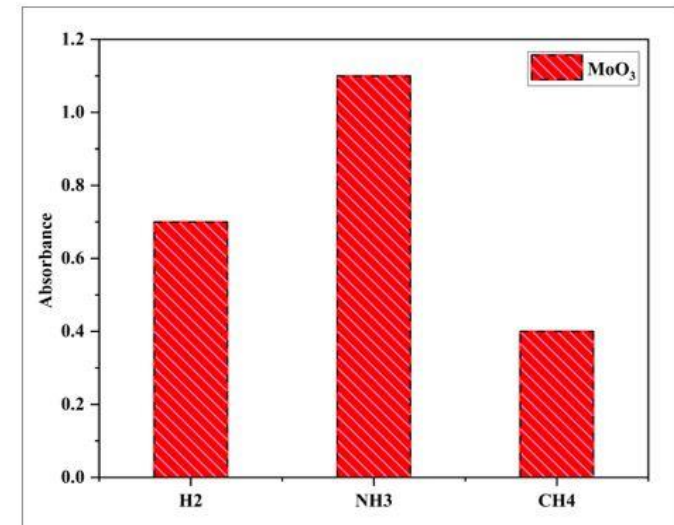

(b)

# CONCLUSION

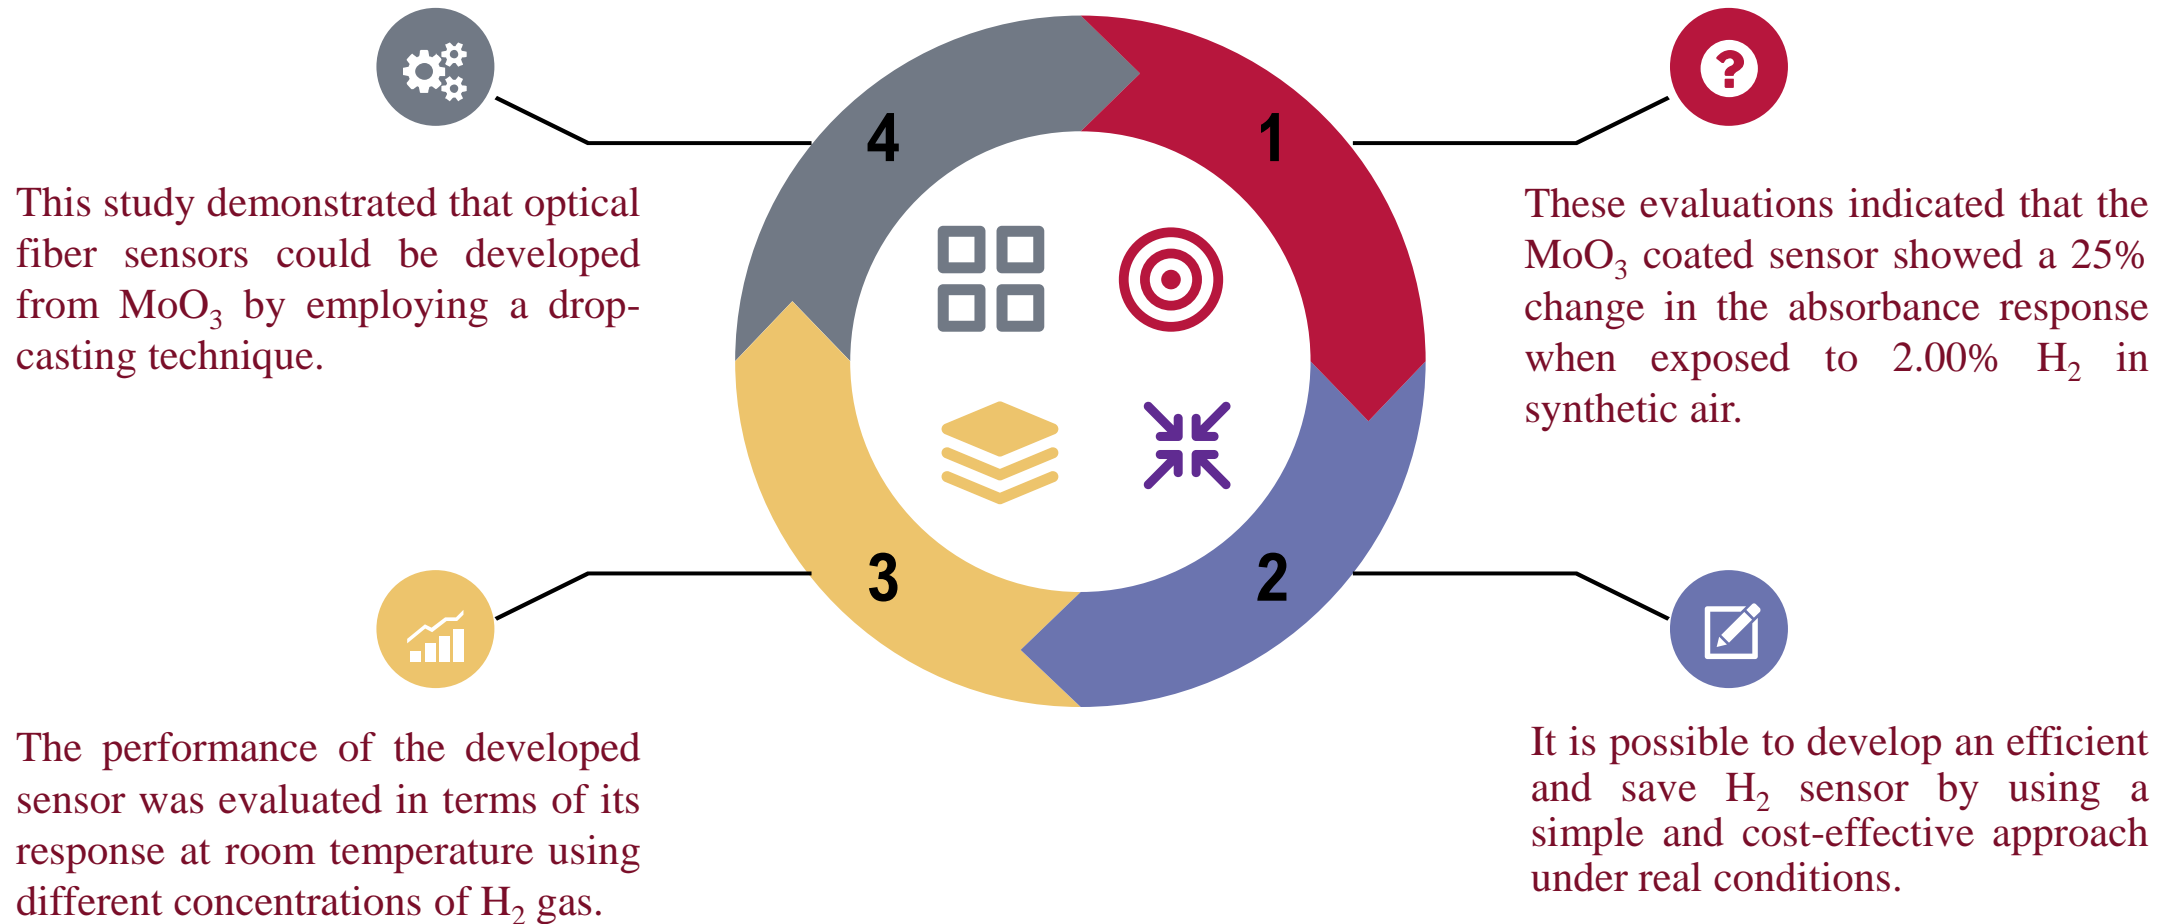

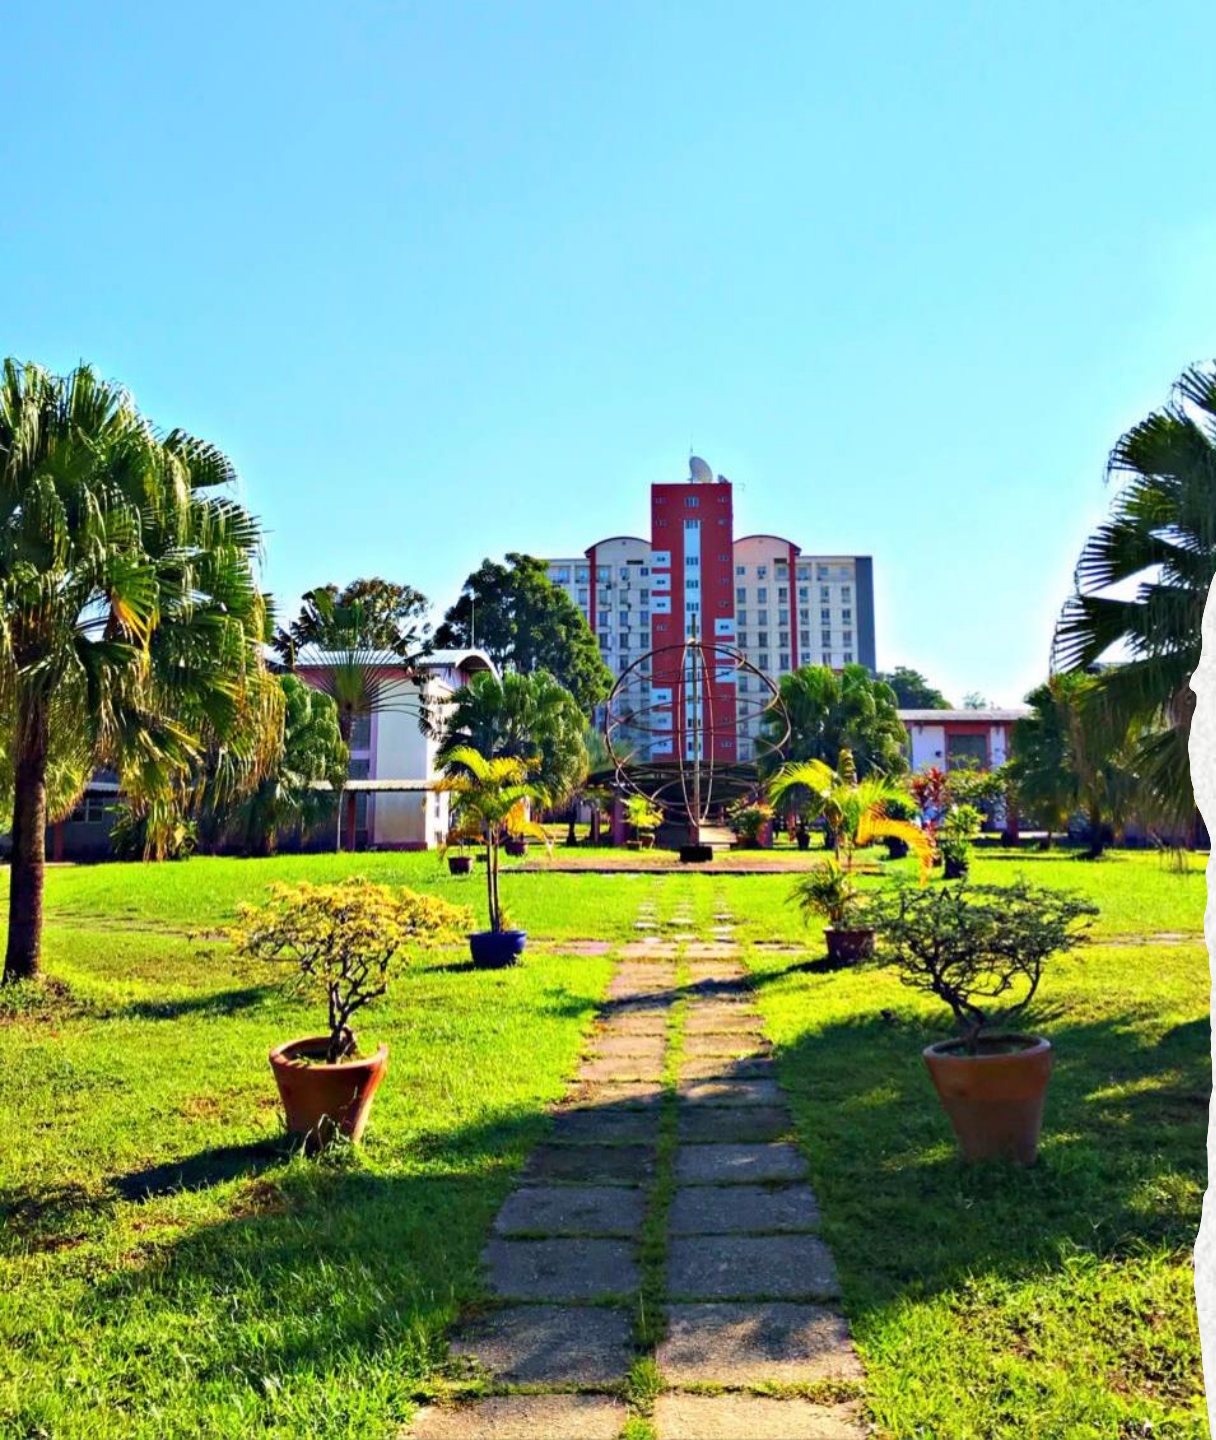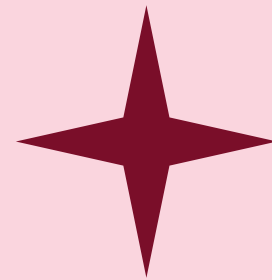

**THANK  
YOU**
